# Supplementary material for: Luminescence-enhanced conjugated polymer dots through thermal treatment for cell imaging
Source: Royal Society of Chemistry journal article supplement (doi:10.1039/d2bm00516f), 2022-01-01
Supplement: d2bm00516f1.pdf [file d2bm00516f1.pdf]

## Supporting Information

### **Luminescence-enhanced Conjugated Polymer Dots Through Thermal Treatment for Cell Imaging**

Yuyang Wu,<sup>a</sup> Hanyu Yang,<sup>a</sup> Chenyang Shi,<sup>a</sup> Hang Sun,<sup>c</sup> Shengyan Yin<sup>\*a</sup> and Guangbin Wang<sup>\*b</sup>

*<sup>a</sup>State Key Laboratory of Integrated Optoelectronics, College of Electronic Science and Engineering, Jilin University, Changchun, Jilin 130012, P. R. China. E-mail: syyin@jlu.edu.cn.*

*<sup>b</sup>Department of Orthopedics, Shengjing Hospital of China Medical University, Shenyang, Liaoning, 110004, P. R. China. E-mail: wanggb@sj-hospital.org.*

*<sup>c</sup>Key Laboratory of Bionic Engineering (Ministry of Education), College of Biological and Agricultural Engineering, Jilin University, Changchun, Jilin 130022, P. R. China.*

1. The absorption and emission spectra of Pdots before and after thermal treatment at different temperature.

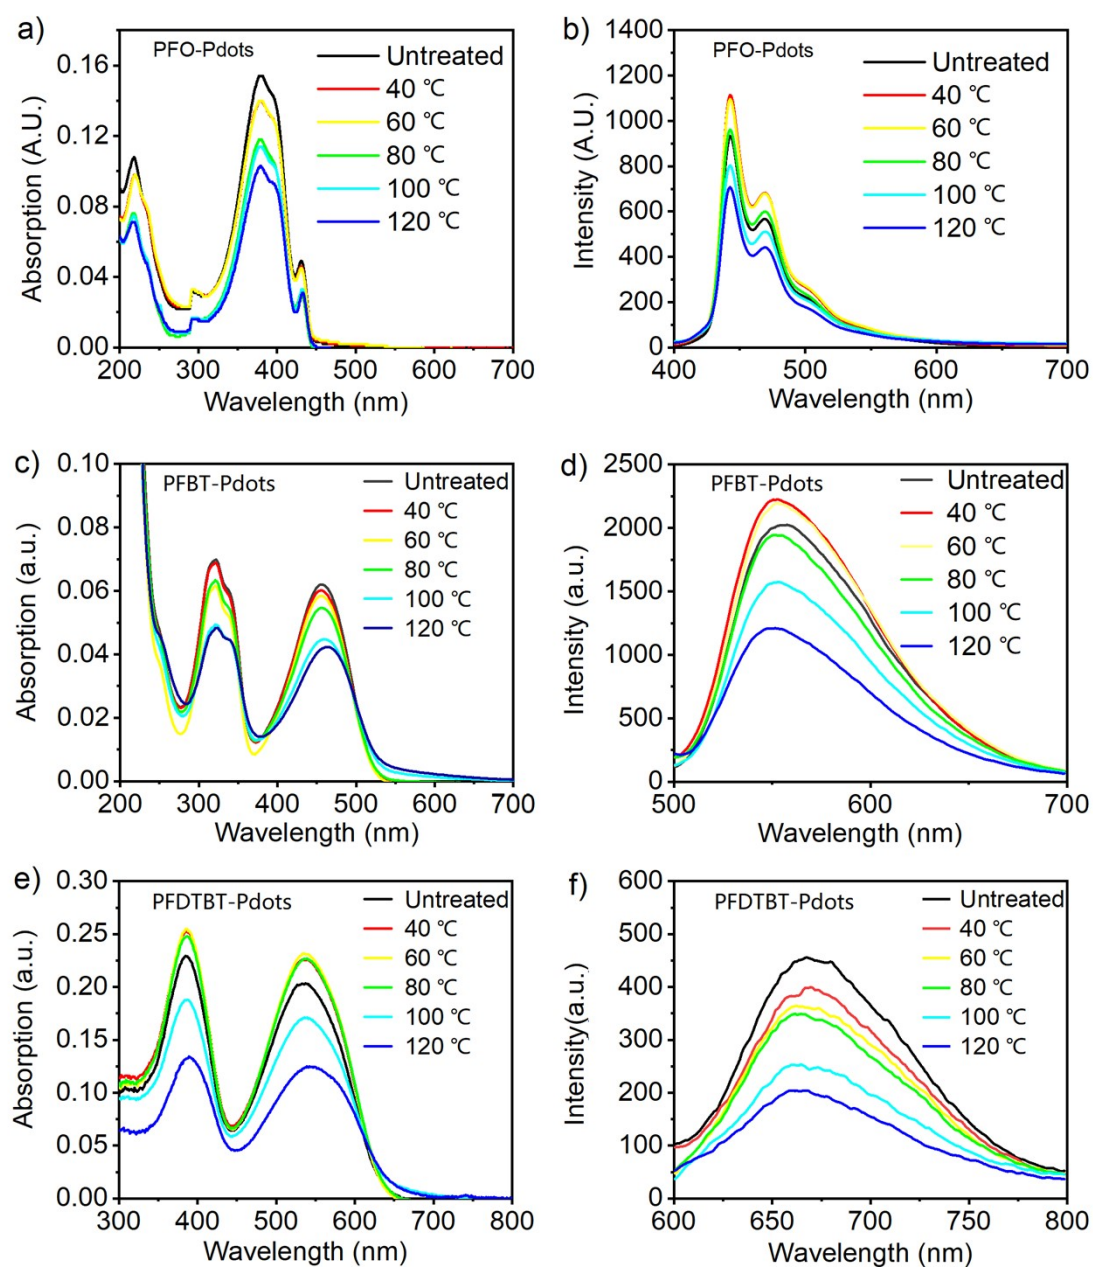

**Fig.S1** Absorption and emission spectra of Pdots before and after thermal treatment at different temperature. (a, c, e) are the absorption spectra of PFO-Pdots, PFBT-Pdots and PFDTBT-Pdots, respectively. (b, d, f) are the emission spectra of PFO-Pdots, PFBT-Pdots and PFDTBT-Pdots, respectively.

2. Infrared spectra of Pdots before and after thermal treatment.

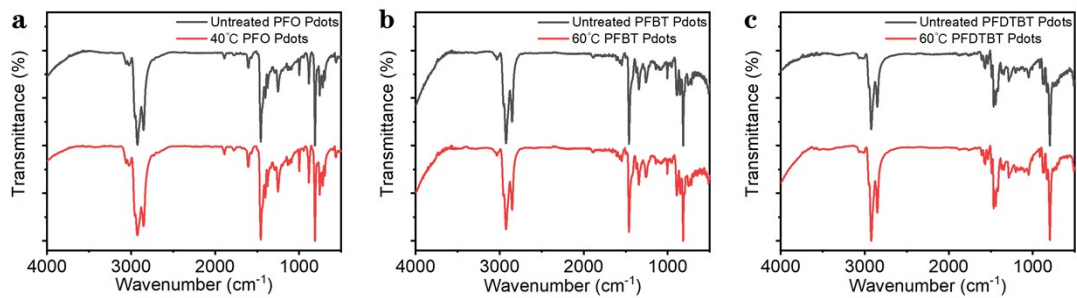

**Fig.S2** FT-IR spectra of Pdots, a) PFO-Pdots before and after thermal treatment at 40 °C, b) PFBT-Pdots before and after thermal treatment at 60 °C, c)PFDTBT-Pdots before and after thermal treatment at 60 °C.

### 3. XPS spectra of PFO-Pdots, PFBT-Pdots, PFDTBT-Pdots before and after thermal treatment

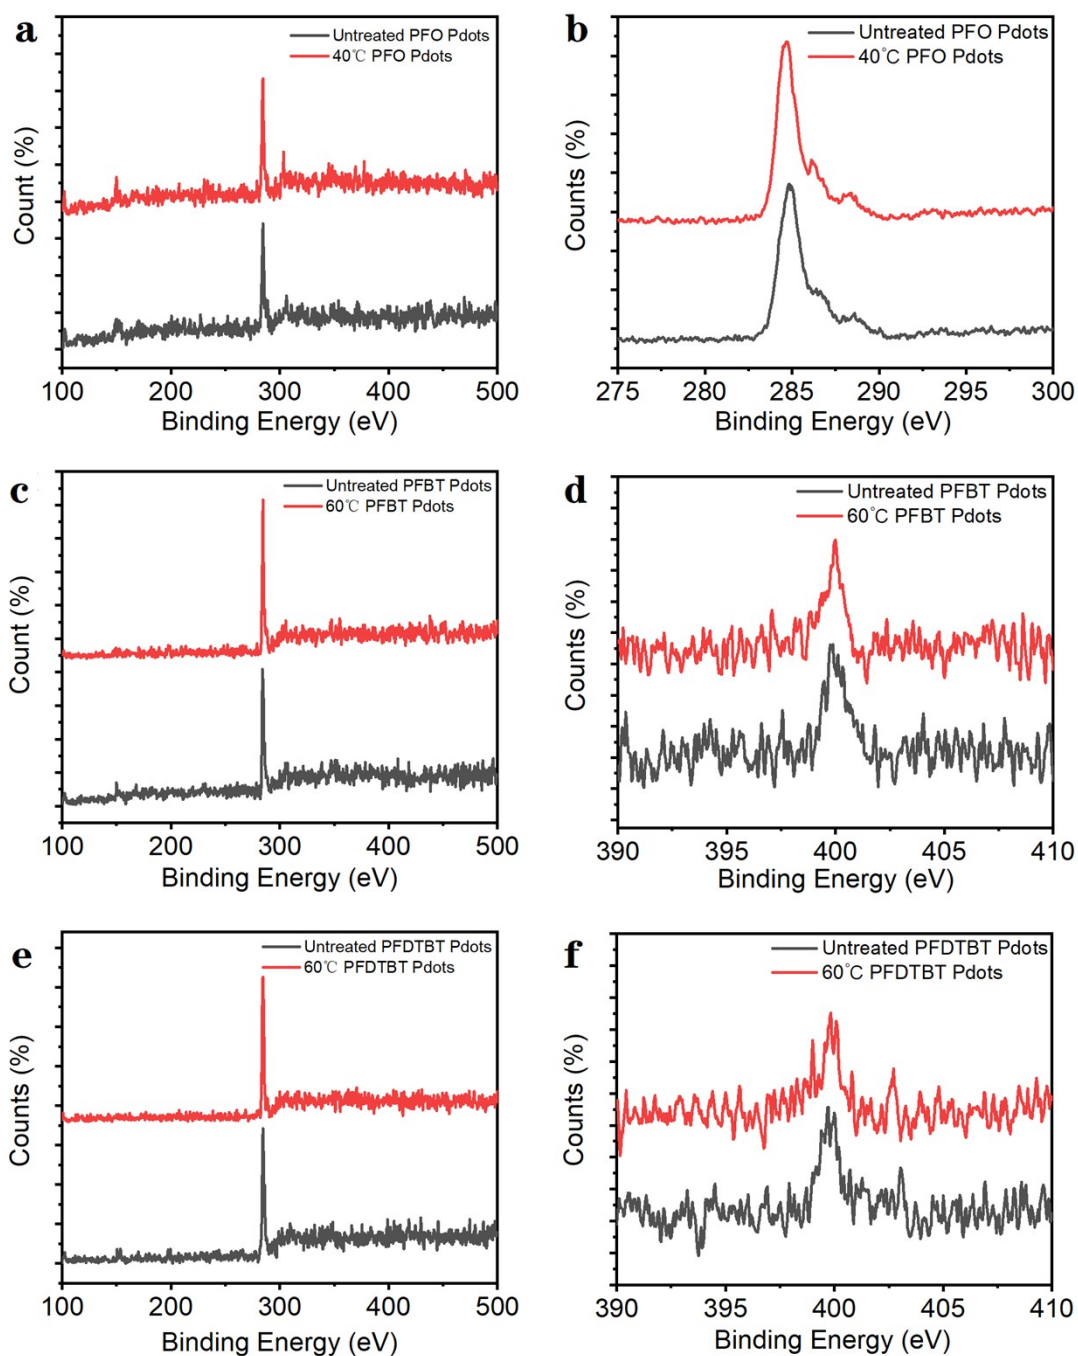

**Fig.S3** XPS spectra of Pdots, a) full spectra of PFO-Pdots before and after thermal treatment at 40 °C, b) C 1s spectra of PFO-Pdots before and after thermal treatment at 40 °C, c) full spectra of PFBT-Pdots before and after thermal treatment at 60 °C, d) N 1s spectra of PFBT-Pdots before and after thermal treatment at 60 °C, e) full spectra of PFDTBT-Pdots before and after thermal treatment at 60 °C, f) N 1s spectra of PFDTBT-Pdots before and after thermal treatment at 60 °C.

4. Table. S1 Quantum efficiency of PFO-Pdots, PFBT-Pdots and PFDTBT-Pdots before and after thermal treatment at 40 °C, 60 °C and 60 °C, respectively.

| quantum efficiency (%) | PFO-Pdots                     | PFBT-Pdots                     | PFDTBT-Pdots                  |
|------------------------|-------------------------------|--------------------------------|-------------------------------|
| Untreated              | 7.387                         | 21.144                         | 3.712                         |
| Treated                | 8.194<br>(Treatment at 40 °C) | 27.375<br>(Treatment at 60 °C) | 3.687<br>(Treatment at 60 °C) |
